# Supplementary material for: State of evidence on municipal strategies for health promotion and prevention: a literature and database research (Scoping Review)
Source: Springer Nature journal article supplement (doi:10.1186/s12889-022-12607-0), 2022-02-14

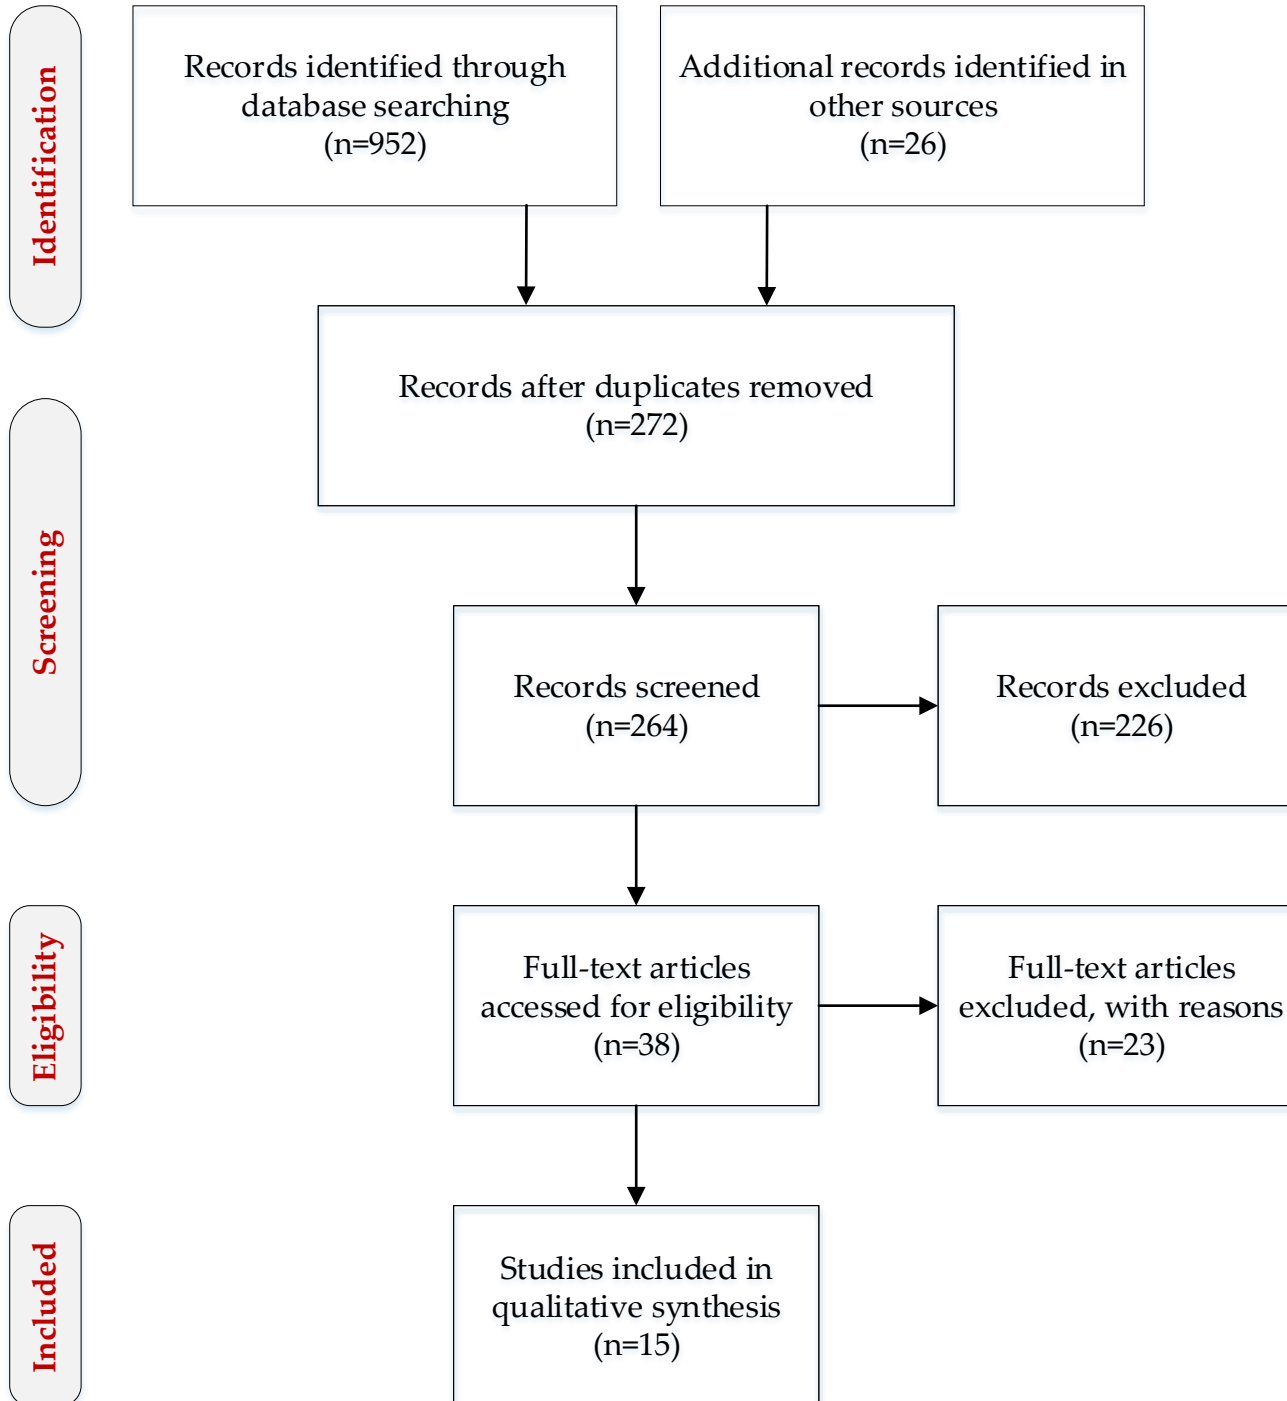

Supplement: MOESM1 [file 20131056]
